# Supplementary material for: Influence of metal ions (Zn2+, Cu2+, Ca2+, Mg2+and Na+) on the water coordinated neutral and zwitterionicl-histidine dimer
Source: Royal Society of Chemistry journal article supplement (doi:10.1039/c4ra08155b), 2014-09-15
Supplement: c4ra08155b1.pdf [file c4ra08155b1.pdf]

**Influence of metal ions ( $\text{Zn}^{2+}$ ,  $\text{Cu}^{2+}$ ,  $\text{Ca}^{2+}$ ,  $\text{Mg}^{2+}$  and  $\text{Na}^+$ ) on the water coordinated  
neutral and zwitterionic L-Histidine dimer**

**P. Umadevi and L. Senthilkumar\***

**Department of Physics, Bharathiar University, Coimbatore, Tamil Nadu, India**

**Corresponding Author: [lsenthilkumar@buc.edu.in](mailto:lsenthilkumar@buc.edu.in)**

**Table S1**

**Electron density ( $\rho$ ), Laplacian of electron density ( $\nabla^2\rho$ ) and ellipticity ( $\varepsilon$ ) and total electron energy density  $H(r)$  all values in (a.u) obtained from gas phase.**

| Structure        | Bond Type(Å)  | $\rho$  |         | $\nabla^2\rho$ |         | $\varepsilon$ |         | H(r)       |          |
|------------------|---------------|---------|---------|----------------|---------|---------------|---------|------------|----------|
|                  |               | Neutral | Zw      | Neutral        | Zw      | Neutral       | Zw      | Neutral    | Zw       |
| Zn <sup>2+</sup> | N25-Zn        | 0.08184 | 0.07002 | 0.31358        | 0.25825 | 0.04589       | 0.04253 | -0.017765  | -0.01443 |
|                  | N14-Zn        | 0.08183 | 0.06992 | 0.31349        | 0.25766 | 0.04591       | 0.04257 | -0.0177675 | -0.01441 |
|                  | O6-Zn         | 0.05248 | 0.06784 | 0.24809        | 0.35878 | 0.03973       | 0.01928 | -0.0057375 | -0.00686 |
|                  | O38-Zn        | 0.05249 | 0.06785 | 0.24814        | 0.35893 | 0.03975       | 0.01988 | -0.005735  | -0.00686 |
|                  | O21-Zn        | 0.0516  | 0.05122 | 0.24899        | 0.24843 | 0.06314       | 0.06744 | -0.0056625 | -0.00562 |
|                  | N2...H5-O8    | 0.04113 | 0.05483 | 0.10888        | 0.14736 | 0.11686       | 0.08041 | -0.00384   | -0.00724 |
|                  | N41...H44-O40 | 0.04114 | 0.0551  | 0.1089         | 0.14757 | 0.11676       | 0.07961 | -0.003845  | -0.0074  |
| Cu <sup>2+</sup> | N25-Cu        | 0.08907 | 0.08234 | 0.37889        | 0.35075 | 0.02667       | 0.02274 | -0.0163875 | -0.01389 |
|                  | N14-Cu        | 0.089   | 0.08234 | 0.37942        | 0.35076 | 0.02657       | 0.02273 | -0.016335  | -0.01389 |
|                  | O6-Cu         | 0.06631 | 0.07682 | 0.38086        | 0.45654 | 0.09500       | 0.07637 | -0.002595  | -0.00382 |
|                  | O38-Cu        | 0.06632 | 0.07682 | 0.38087        | 0.45656 | 0.09497       | 0.07640 | -0.0025925 | -0.00382 |
|                  | O21-Cu        | 0.03433 | 0.03089 | 0.14514        | 0.12866 | 0.06816       | 0.08126 | -0.003675  | -0.00298 |
|                  | N2...H5-O8    | 0.04322 | 0.05421 | 0.1102         | 0.14791 | 0.10834       | 0.08359 | -0.00487   | -0.00684 |
|                  | N41...H44-O40 | 0.04325 | 0.05421 | 0.11016        | 0.14791 | 0.10826       | 0.08358 | -0.00488   | -0.00684 |
| Ca <sup>2+</sup> | N25-Ca        | 0.03393 | 0.03017 | 0.1461         | 0.13004 | 0.09717       | 0.08630 | 0.003095   | 0.00328  |
|                  | N14-Ca        | 0.03594 | 0.03293 | 0.15635        | 0.14485 | 0.09487       | 0.08293 | 0.0031075  | 0.003423 |
|                  | O6-Ca         | 0.03901 | 0.04674 | 0.22849        | 0.29048 | 0.08512       | 0.00293 | 0.0071325  | 0.00765  |
|                  | O38-Ca        | 0.04113 | 0.04161 | 0.24886        | 0.23207 | 0.00735       | 0.07204 | 0.007565   | 0.006248 |
|                  | O21-Ca        | 0.03296 | 0.03547 | 0.18327        | 0.1989  | 0.13935       | 0.13352 | 0.0061875  | 0.006325 |
|                  | N2...H5-O8    | 0.04558 | 0.0522  | 0.11137        | 0.14595 | 0.09636       | 0.08857 | -0.0061075 | -0.00577 |
|                  | N41...H44-O40 | 0.05005 | 0.03751 | 0.11111        | 0.12861 | 0.08083       | 0.15557 | -0.0086925 | 0.000642 |
| Mg <sup>2+</sup> | N25-Mg        | 0.0355  | 0.03269 | 0.04728        | 0.1981  | 0.04874       | 0.03424 | 0.00647    | 0.006385 |
|                  | N14- Mg       | 0.0355  | 0.03269 | 0.04728        | 0.1981  | 0.04874       | 0.03425 | 0.00647    | 0.006385 |

|                 |               |         |         |         |         |         |         |            |          |
|-----------------|---------------|---------|---------|---------|---------|---------|---------|------------|----------|
|                 | O6- Mg        | 0.03688 | 0.04258 | 0.06252 | 0.36472 | 0.05486 | 0.03985 | 0.0130025  | 0.01489  |
|                 | O38- Mg       | 0.03688 | 0.04258 | 0.06252 | 0.36472 | 0.05488 | 0.03985 | 0.013      | 0.01489  |
|                 | O21- Mg       | 0.03224 | 0.03108 | 0.05139 | 0.23987 | 0.07184 | 0.08053 | 0.011015   | 0.010718 |
|                 | N2...H5-O8    | 0.04711 | 0.05555 | 0.11157 | 0.14942 | 0.09171 | 0.07823 | -0.0069575 | -0.00756 |
|                 | N41...H44-O40 | 0.04711 | 0.05555 | 0.11157 | 0.14942 | 0.09171 | 0.07823 | -0.0069575 | -0.00756 |
| Na <sup>+</sup> | N25-Na        | 0.01922 | *       | 0.10856 |         | 0.04873 |         | 0.00468    |          |
|                 | N14-Na        | 0.01924 |         | 0.10873 |         | 0.04871 |         | 0.0046825  |          |
|                 | O6-Na         | 0.01807 |         | 0.12204 |         | 0.04271 |         | 0.00588    |          |
|                 | O38-Na        | 0.01805 |         | 0.12178 |         | 0.04283 |         | 0.005865   |          |
|                 | O21-Na        | 0.01931 |         | 0.12847 |         | 0.12195 |         | 0.0059175  |          |
|                 | N2...H5-O8    | 0.04084 |         | 0.11306 |         | 0.11313 |         | -0.003515  |          |
|                 | N41...H44-O40 | 0.04079 |         | 0.11301 |         | 0.11337 |         | -0.0034875 |          |

**\*Data not available**

Table S2

Natural charges (in e) and dipole moment (Debye) of the complexes calculated in gas phase at B3lyp/6-311G\*\* level

| Structure    | Zn <sup>2+</sup> (His) <sub>2</sub> · H <sub>2</sub> O | Cu <sup>2+</sup> (His) <sub>2</sub> · H <sub>2</sub> O | Ca <sup>2+</sup> (His) <sub>2</sub> · H <sub>2</sub> O | Mg <sup>2+</sup> (His) <sub>2</sub> · H <sub>2</sub> O | Na <sup>+</sup> (His) <sub>2</sub> · H <sub>2</sub> O | Zn <sup>2+</sup> (His) <sub>2</sub> · H <sub>2</sub> O | Cu <sup>2+</sup> (His) <sub>2</sub> · H <sub>2</sub> O | Ca <sup>2+</sup> (His) <sub>2</sub> · H <sub>2</sub> O | Mg <sup>2+</sup> (His) <sub>2</sub> · H <sub>2</sub> O | Na <sup>+</sup> (His) <sub>2</sub> · H <sub>2</sub> O |
|--------------|--------------------------------------------------------|--------------------------------------------------------|--------------------------------------------------------|--------------------------------------------------------|-------------------------------------------------------|--------------------------------------------------------|--------------------------------------------------------|--------------------------------------------------------|--------------------------------------------------------|-------------------------------------------------------|
| <b>Metal</b> | 1.700<br>(1.714)*                                      | 1.511<br>(1.500)                                       | 1.608<br>(1.592)                                       | 1.426<br>(1.417)                                       | 0.718<br>\$                                           | 1.718<br>(1.724)                                       | 1.517<br>(1.517)                                       | 1.677<br>(1.640)                                       | 1.463<br>(1.424)                                       | 0.734<br>\$                                           |
| <b>ΔQ</b>    | 0.300<br>(0.286)                                       | 0.777<br>(0.500)                                       | 0.371<br>(0.408)                                       | 0.574<br>(0.583)                                       | 0.282                                                 | 0.282<br>(0.276)                                       | 0.483<br>(0.483)                                       | 0.323<br>(0.360)                                       | 0.537<br>(0.576)                                       | 0.266                                                 |
| <b>N25</b>   | -0.732<br>(-0.702)                                     | -0.665<br>(-0.654)                                     | -0.654<br>(-0.632)                                     | -0.650<br>(-0.637)                                     | -0.552                                                | -0.719<br>(-0.697)                                     | -0.666<br>(-0.599)                                     | -0.633<br>(-0.618)                                     | -0.651<br>(-0.633)                                     | -0.572                                                |
| <b>N14</b>   | -0.732<br>(-0.702)                                     | -0.664<br>(-0.654)                                     | -0.662<br>(-0.635)                                     | -0.650<br>(-0.637)                                     | -0.551                                                | -0.719<br>(-0.697)                                     | -0.666<br>(-0.599)                                     | -0.643<br>(-0.630)                                     | -0.651<br>(-0.633)                                     | -0.572                                                |
| <b>O6</b>    | -0.769<br>(-0.870)                                     | -0.742<br>(-0.828)                                     | -0.756<br>(-0.837)                                     | -0.732<br>(-0.815)                                     | -0.636                                                | -0.736<br>(-0.860)                                     | -0.728<br>(-0.595)                                     | -0.718<br>(-0.795)                                     | -0.711<br>(-0.814)                                     | -0.648                                                |
| <b>O38</b>   | -0.769<br>(-0.870)                                     | -0.742<br>(-0.828)                                     | -0.726<br>(-0.779)                                     | -0.733<br>(-0.815)                                     | -0.636                                                | -0.736<br>(-0.860)                                     | -0.728<br>(-0.595)                                     | -0.714<br>(-0.827)                                     | -0.711<br>(-0.814)                                     | -0.648                                                |
| <b>O21</b>   | -0.978<br>(-0.970)                                     | -0.952<br>(-0.941)                                     | -0.960<br>(-0.980)                                     | -0.930<br>(-0.923)                                     | -0.963                                                | -0.987<br>(-0.978)                                     | -0.964<br>(-0.527)                                     | -0.957<br>(-0.973)                                     | -0.940<br>(-0.931)                                     | -0.921                                                |
| <b>μ</b>     | 2.335<br>(2.001)                                       | 2.730<br>(4.116)                                       | 1.594<br>(3.530)                                       | 2.428<br>(0.844)                                       | 0.263                                                 | 1.919<br>(8.648)                                       | 3.842<br>(9.962)                                       | 2.614<br>(5.948)                                       | 3.150<br>(5.621)                                       | 1.699                                                 |

\*The value in parentheses indicates the zwitterionic complex.

\$ Data not available
